# Supplementary material for: Heteromeric Channels Formed From Alternating Kv7.4 and Kv7.5 α-Subunits Display Biophysical, Regulatory, and Pharmacological Characteristics of Smooth Muscle M-Currents
Source: PubMed Central journal article supplement (PMC7434985; doi:10.3389/fphys.2020.00992), 2020-08-12
Supplement: Data_Sheet_1.pdf [file Data_Sheet_1.pdf]

**A) Q4-Q5 Dimer:** Q5-FLAG replaces T-N-M-D-STOP, inserting A-L-A-T

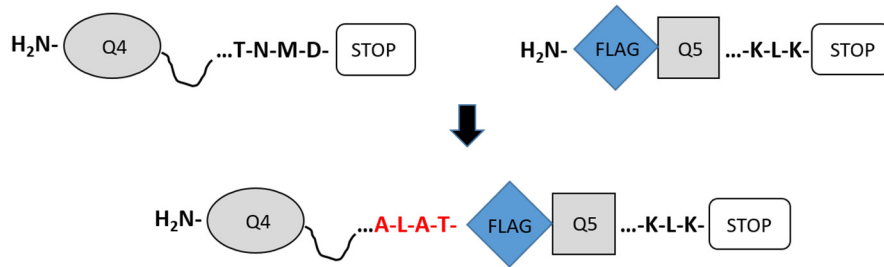

**B) Q5-Q4 Dimer:** Q4 replaces Q5 STOP codon, inserting Y-E-F

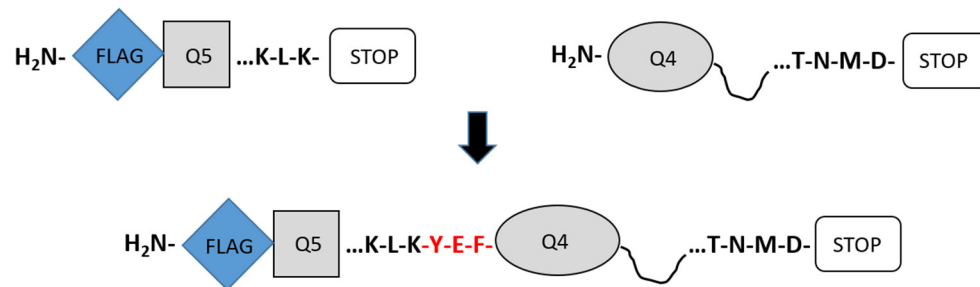

**C) Q5-Q4-Q5-Q4:** Two Q5-Q4 dimers are joined eliminating 1<sup>st</sup> Q4 C-terminus (Q-T-L-S-I-S-R-S-V-S-T-N-M-D-STOP) and 2<sup>nd</sup> FLAG

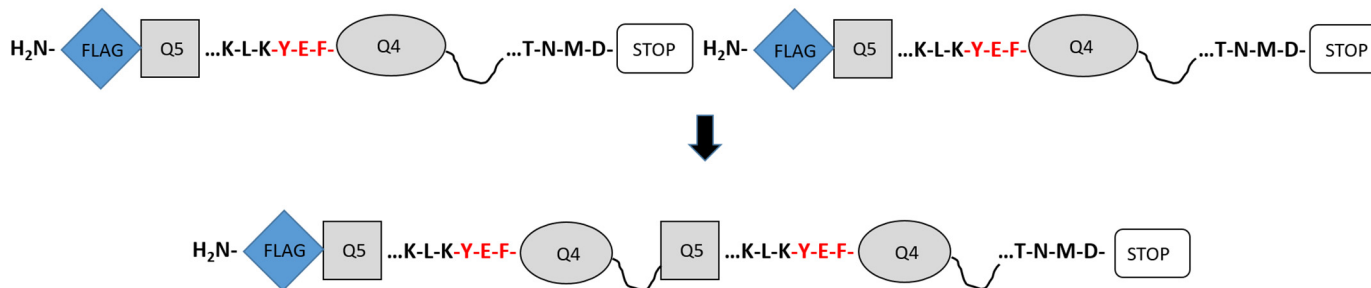

**Figure S1. Construction of Concatenated Kv7 Subunits.** Schematic representations of a) Q4-Q5; b) Q5-Q4; and c) Q5-Q4-Q5-Q4 constructs. Amino acids inserted as a result of the cloning strategy are shown in red.
